# Supplementary material for: First-principles study on the electronic structures and contact properties of graphene/XC (X = P, As, Sb, and Bi) van der Waals heterostructures
Source: Royal Society of Chemistry journal article supplement (doi:10.1039/d1cp03850h), 2021-01-01
Supplement: d1cp03850h1.pdf [file d1cp03850h1.pdf]

## Supporting Information

### First principles study on the electronic structures and contact properties of graphene/XC (X = P, As, Sb, Bi) van der Waals heterostructures

Xuemin Hu<sup>a</sup>, Wenqiang Liu<sup>b</sup>, Jialin Yang<sup>b</sup>, Shengli Zhang<sup>\*b,c</sup>, Yuanfeng Ye<sup>\*a</sup>

<sup>a</sup>School of Material Engineering, Jinling Institute of Technology, Nanjing 211169, China

<sup>b</sup>MIT Key Laboratory of Advanced Display Materials and Devices, School of Materials Science and Engineering,  
Nanjing University of Science and Technology, Nanjing 210094, China

<sup>c</sup>National Laboratory of Solid State Microstructures, Nanjing University, Nanjing 210093, China

Email: zhangslvip@njjust.edu.cn, yyf@jit.edu.cn

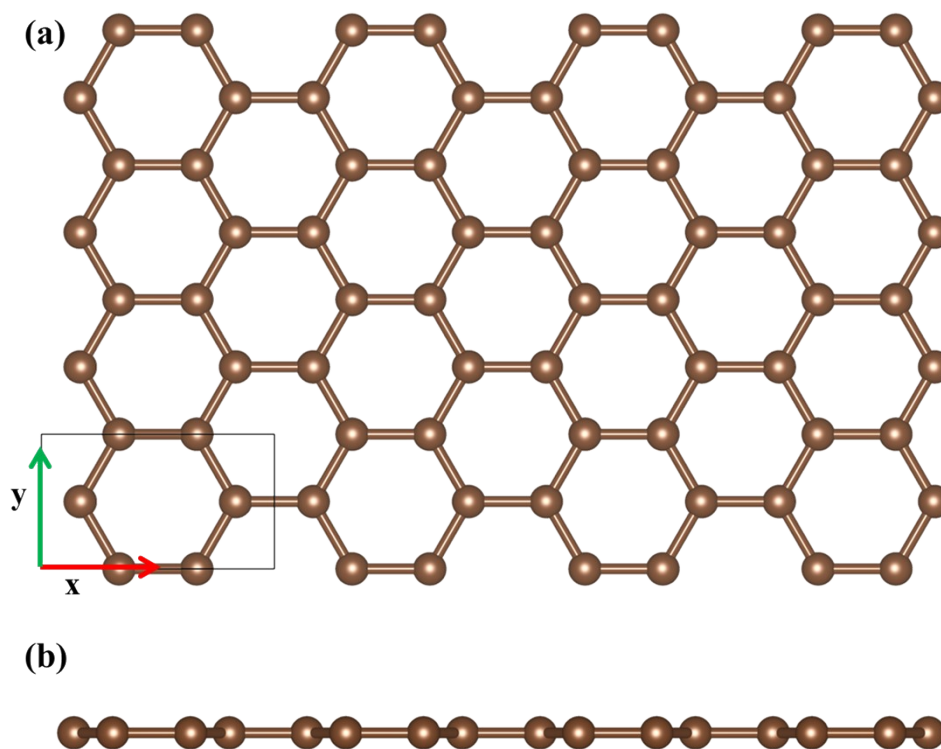

**Fig. S1** (a) Top and (b) side views of the optimized graphene (Gr) monolayer.

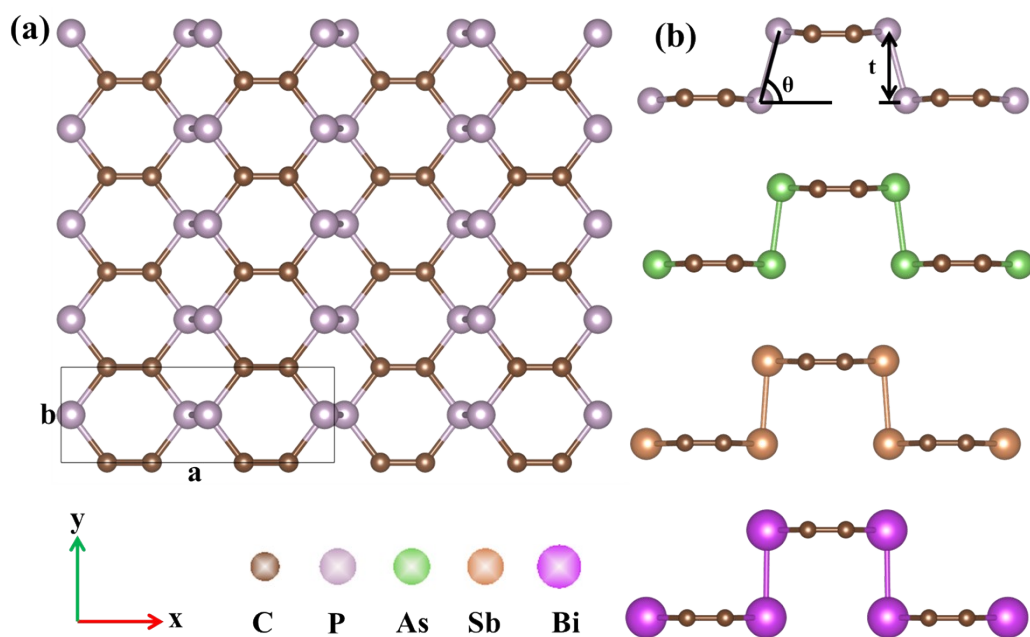

**Fig. S2** (a) Top and (b) side views of the optimized atomic structures of XC (X = P, As, Sb, Bi) monolayers.

**Table S1** Optimized geometric parameters of XC (X = P, As, Sb, Bi) monolayers: bonding length (X-C, C-C and X-X), inclination ( $\theta$ ) of X-X bond and vertical distance (t) between two adjacent X atoms.

|     | X-C ( $\text{\AA}$ ) | C-C ( $\text{\AA}$ ) | X-X ( $\text{\AA}$ ) | $\theta$ ( $^\circ$ ) | t ( $\text{\AA}$ ) |
|-----|----------------------|----------------------|----------------------|-----------------------|--------------------|
| PC  | 1.82                 | 1.36                 | 2.35                 | 74.94                 | 2.27               |
| AsC | 1.98                 | 1.35                 | 2.57                 | 82.64                 | 2.54               |
| SbC | 2.20                 | 1.34                 | 2.92                 | 86.02                 | 2.91               |
| BiC | 2.32                 | 1.33                 | 3.06                 | 89.28                 | 3.05               |

**Table S2** Optimized lattice constants of Gr and XC monolayers (X = P, As, Sb, Bi).

| Lattice constants  | Gr   | PC   | AsC  | SbC  | BiC  |
|--------------------|------|------|------|------|------|
| a ( $\text{\AA}$ ) | 4.27 | 8.56 | 8.19 | 8.50 | 8.47 |
| b ( $\text{\AA}$ ) | 2.47 | 2.92 | 3.13 | 3.47 | 3.66 |

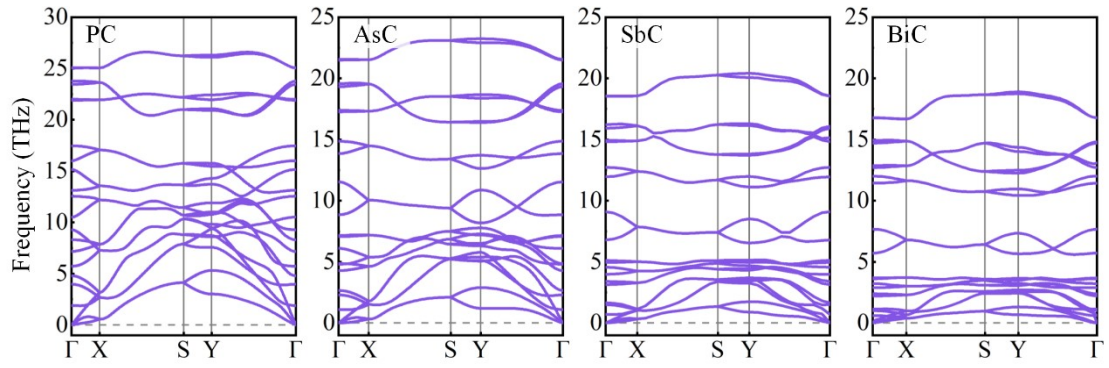

**Fig. S3** Phonon spectra of isolated XC monolayers ( $X = \text{P, As, Sb, Bi}$ ).

**Table S3** Lattice mismatches of Gr/XC ( $X = \text{P, As, Sb, Bi}$ ) heterostructures.

| Lattice mismatch | Gr/PC | Gr/AsC | Gr/SbC | Gr/BiC |
|------------------|-------|--------|--------|--------|
| x direction      | 0.06% | 2.12%  | 0.28%  | 0.48%  |
| y direction      | 0.75% | 2.48%  | -2.63% | 0.63%  |

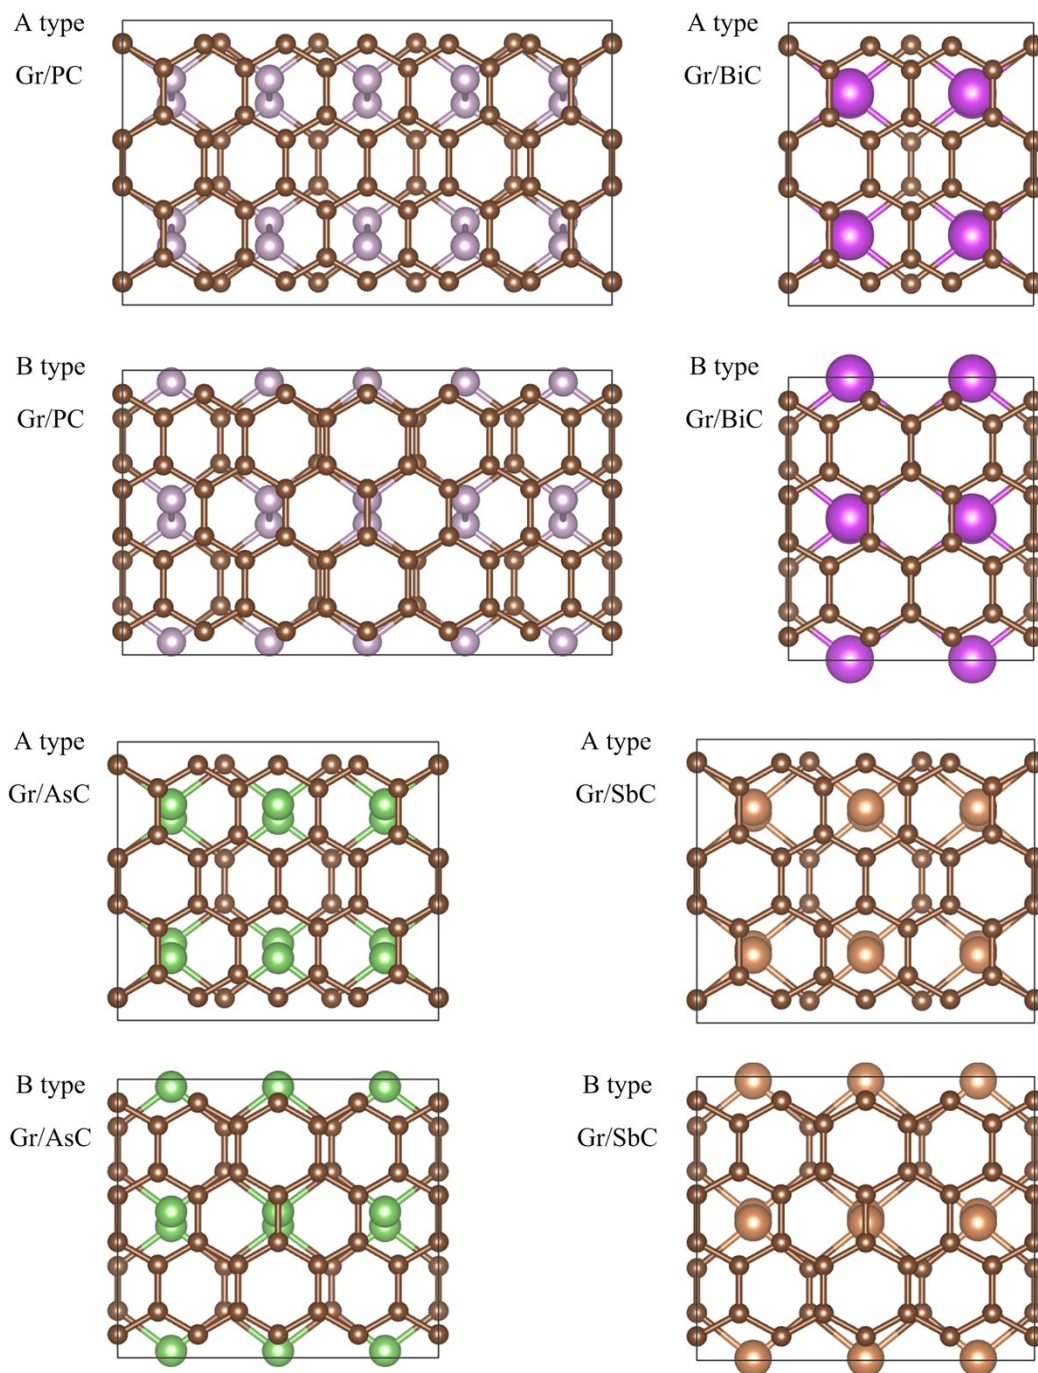

**Fig. S4** Geometry configurations for Gr/XC heterostructures ( $X = \text{P}, \text{As}, \text{Sb}, \text{Bi}$ ) with two different stacking types.

**Table S4** Total energies ( $E_{\text{tot}}$ ) of Gr/XC heterostructures (X = P, As, Sb, Bi) with different stacking types.

| Gr/XC  | type | $E_{\text{tot}}$ (eV) |
|--------|------|-----------------------|
| Gr/PC  | A    | -723.9904             |
|        | B    | -723.9883             |
| Gr/AsC | A    | -449.2705             |
|        | B    | -446.6225             |
| Gr/SbC | A    | -438.4028             |
|        | B    | -435.3700             |
| Gr/BiC | A    | -313.7318             |
|        | B    | -313.7298             |

**Table S5** The bond lengths and bond angles of Gr/XC heterostructures.

| Gr/XC  | X-C (Å) | C-C (Å) | X-X (Å) | C-X-X (°) |
|--------|---------|---------|---------|-----------|
| Gr/PC  | 1.83    | 1.36    | 2.30    | 97.09     |
| Gr/AsC | 2.01    | 1.35    | 2.54    | 93.48     |
| Gr/SbC | 2.18    | 1.34    | 2.92    | 91.18     |
| Gr/BiC | 2.33    | 1.33    | 3.04    | 90.77     |

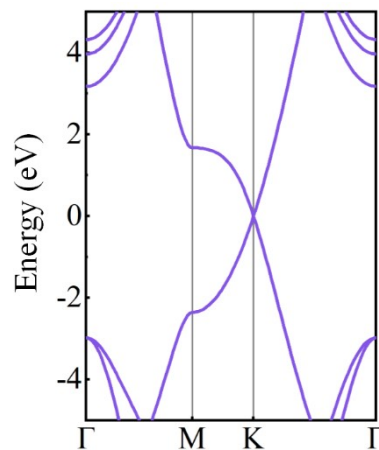

**Fig. S5** The band structure of pristine graphene.

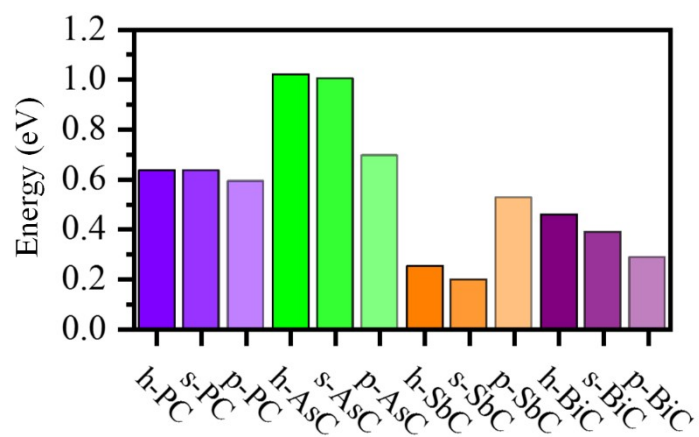

**Fig. S6** The comparison of the band gaps of XC in the Gr/XC heterostructures (h-XC), isolated XC with strained supercell sizes of heterostructures (s-XC) and pristine XC without strains (p-XC).
